# Supplementary material
Source: publisher site journal article supplement (https://www.dovepress.com/article/622078)
Supplement: Supplementary file 1 [file 622078%20Supplementary%20file.docx]

Supplementary File – Post operative Trajectory

The postoperative course was dominated by refractory sepsis with multiorgan dysfunction. Serial laboratory monitoring over the nine-day admission documented a consistent and ultimately fatal physiological decline across every organ system.

The inflammatory burden was massive from the outset. C-reactive protein peaked at 194.4 mg/L (reference <5 mg/L) on 05 December, representing a 39-fold elevation at the time of death. Serum albumin measured on 04 December was 2.0 g/dL (reference 3.5–5.2 g/dL), confirming severe hypoalbuminemia with loss of oncotic pressure driving third-space fluid accumulation, as confirmed by diffuse subcutaneous oedema on left leg Doppler study.

The serial lactate trajectory was the single most informative indicator of the clinical course (Table 1). Lactate was already elevated at 2.0 mmol/L on admission, rose to 3.7 mmol/L within 48 hours before surgery, improved marginally to 2.5 mmol/L on the immediate post-operative night, then re-elevated persistently to 3.2–3.7 mmol/L through 05–06 December and reached a terminal peak of 4.8 mmol/L at 16:37 on 07 December. Lactate never normalized at any point during the admission, establishing an unbroken pattern of tissue oxygen debt from presentation to death, the physiological signature of uncontrolled septic shock.

The coagulation profile deteriorated progressively. INR tracked from 1.18 on 02 December to 1.49 on 05 December, 1.42 on 06 December, and 1.53 on 07 December. APTT rose above the upper limit in the terminal days. A D-dimer of 4,507 ng/mL on admission, nine times the upper limit of normal, in combination with the serial thrombocytopenia (platelets 243 × 10³/µL on admission falling to a nadir of 70 × 10³/µL on 06 December) constituted a pattern consistent with evolving disseminated intravascular coagulation. The most dramatic hematological event occurred in the early hours of 06 December: hemoglobin fell acutely from 10.8 to 6.0 g/dL with a concurrent platelet count of 70 × 10³/µL, consistent with acute hemorrhage superimposed on consumptive coagulopathy. Six units of packed red cells were transfused, with partial hematological recovery.

The renal function showed obstructive uropathy from admission, with creatinine peaking at 1.79 mg/dL on 30 November before apparent partial improvement following surgery. However, creatinine re-rose to 1.12 mg/dL by 07 December. Serum sodium rose to 150 mmol/L on 06 December and chloride was persistently elevated at 119-125 mmol/L throughout, reflecting hyperchloremic metabolic acidosis from saline resuscitation and impaired urinary acid excretion.

Wound culture obtained on 04 December grew *Escherichia coli* with resistance to cefotaxime, cefuroxime, cotrimoxazole, ofloxacin, and tetracycline, and sensitivity to amikacin, colistin, gentamicin, and tigecycline. This resistance phenotype is consistent with an extended-spectrum beta-lactamase (ESBL)-producing organism. The presence of an MDR Gram-negative surgical site infection in a critically ill patient with multiorgan dysfunction, incomplete source control (R1 resection with unresectable retroperitoneal tumor residue), and an undrained obstructive uropathy created an irreversible infectious burden.

The terminal ABG on 07 December 2025 at 16:37 showed pH 7.30, PCO₂ 51.2 mmHg, HCO₃ 28.8 mEq/L, PO₂ 23.3 mmHg (SO₂ 37.1%), and lactate 4.8 mmol/L, demonstrating combined metabolic and respiratory acidosis with critical hypoxemia — the hallmark of terminal cardiorespiratory failure. A repeat ABG at 18:58 showed a sustained pH of 7.30, lactate 4.2 mmol/L, and PO₂ 88.8 mmHg on high-flow oxygen (PO₂/FiO₂ 424.9). The patient died on 07 December 2025, nine days after initial presentation, with refractory multiorgan failure due to septic shock.
